# Supplementary material for: Synthetic preparation of novel 3D Si/TiO2–Ti2O3 composite nanorod arrays as anodes in lithium ion batteries
Source: Royal Society of Chemistry journal article supplement (doi:10.1039/c5ra03595c), 2015-01-01
Supplement: c5ra03595c1.pdf [file c5ra03595c1.pdf]

## Supporting Information

### **A novel 3D Si/TiO<sub>2</sub>-Ti<sub>2</sub>O<sub>3</sub> nanorod arrays composite used as anode material for lithium ion batteries**

*Yuan Zhong<sup>a</sup>, Chuang Yue<sup>a,b,d</sup>, Binbin Chen<sup>c</sup>, Shibo Sun<sup>a</sup>, Mingsen Zheng<sup>c</sup>, Libo Zhao<sup>b</sup>, Suntao Wu<sup>a</sup>, Jing Li<sup>\*a,b,d</sup>, Junyong Kang<sup>a</sup>, Liwei Lin<sup>d</sup>*

<sup>a</sup> Department of Physics/Pen-Tung Sah Micro-Nano Institute of Science and Technology, Xiamen University, Xiamen, Fujian, 361005, China

<sup>b</sup> State Key Laboratory for Manufacturing Systems Engineering, Xi'an Jiaotong University, Xi'an, Shanxi, 710049, China

<sup>c</sup> Department of Chemistry, Xiamen University, Xiamen, Fujian, 361005, China

<sup>d</sup> Department of Mechanical Engineering, University of California, Berkeley, CA 94720, United States

\*Corresponding author E-mail: [lijing@xmu.edu.cn](mailto:lijing@xmu.edu.cn) (J. L.)

## Supplementary Figures

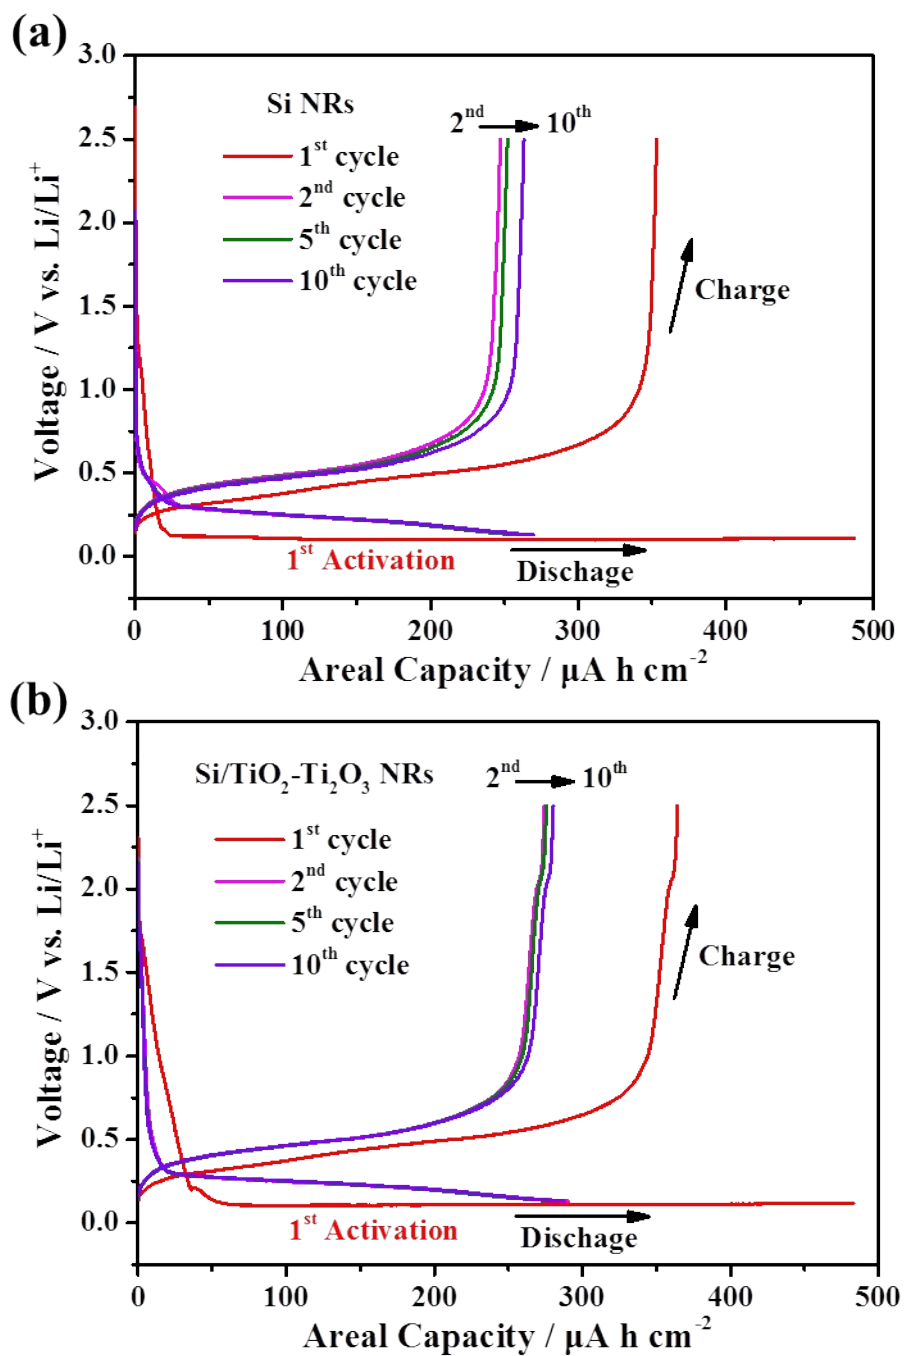

**Figure S1.** Charge-discharge curves of (a) Si NRs and (b) Si/TiO<sub>2</sub>-Ti<sub>2</sub>O<sub>3</sub> NRs during the 1<sup>st</sup>, 2<sup>nd</sup>, 5<sup>th</sup> and 10<sup>th</sup> cycle under a current density of 20  $\mu\text{A cm}^{-2}$  after a galvanostatic discharge activation process for 24 h in the first cycle.

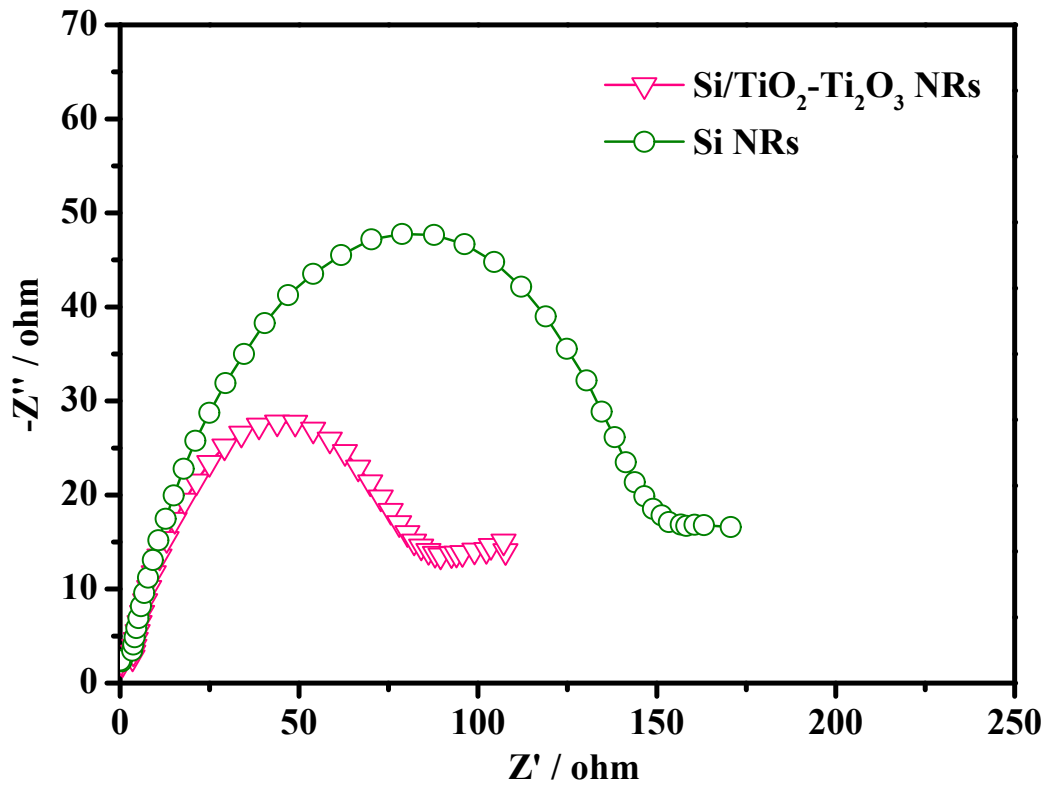

**Figure S2.** The impedance spectra of Si/TiO<sub>2</sub>-Ti<sub>2</sub>O<sub>3</sub> NRs compared with that in bare Si NRs under amplitude of 5.0 mV and with a frequency scan from 100 k to 0.1 Hz.

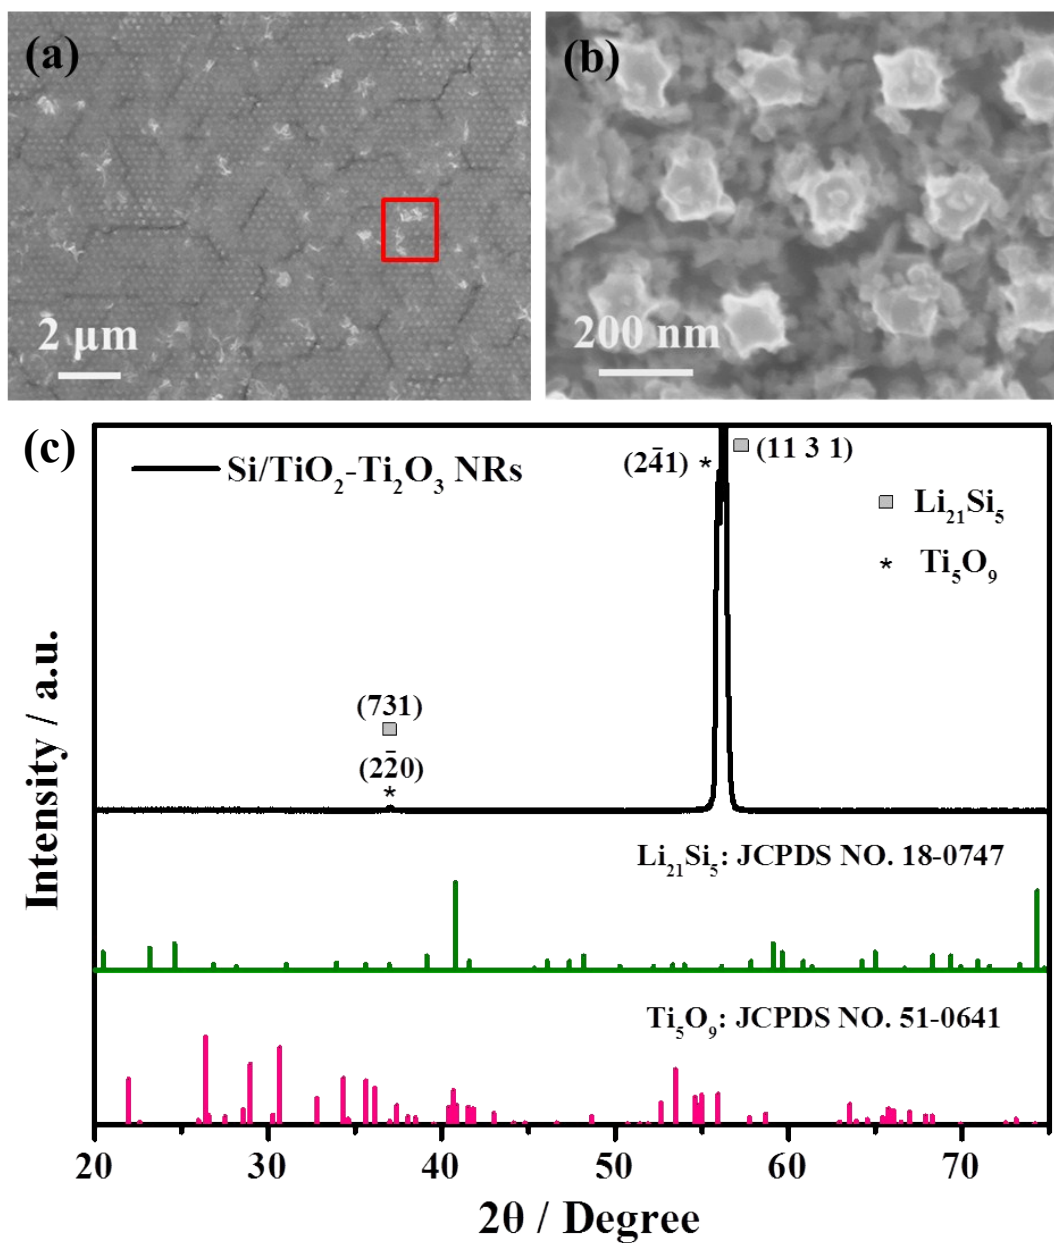

**Figure S3.** (a) SEM image, (b) High magnification SEM image, and (c) XRD pattern of Si/TiO<sub>2</sub>-Ti<sub>2</sub>O<sub>3</sub> NRs anode after CV measurement for ten discharge/charge cycles (within the voltage range of 0.01 to 2.5 V at the scan rate of 0.1 mV s<sup>-1</sup>).
